# Supplementary material for: So Shiho Tang Reduces Inflammation in Lipopolysaccharide-Induced RAW 264.7 Macrophages and Dextran Sodium Sulfate-Induced Colitis Mice
Source: MDPI journal article supplement (doi:10.3390/biom14040451), 2024-04-07
Supplement: s1 [file s1]

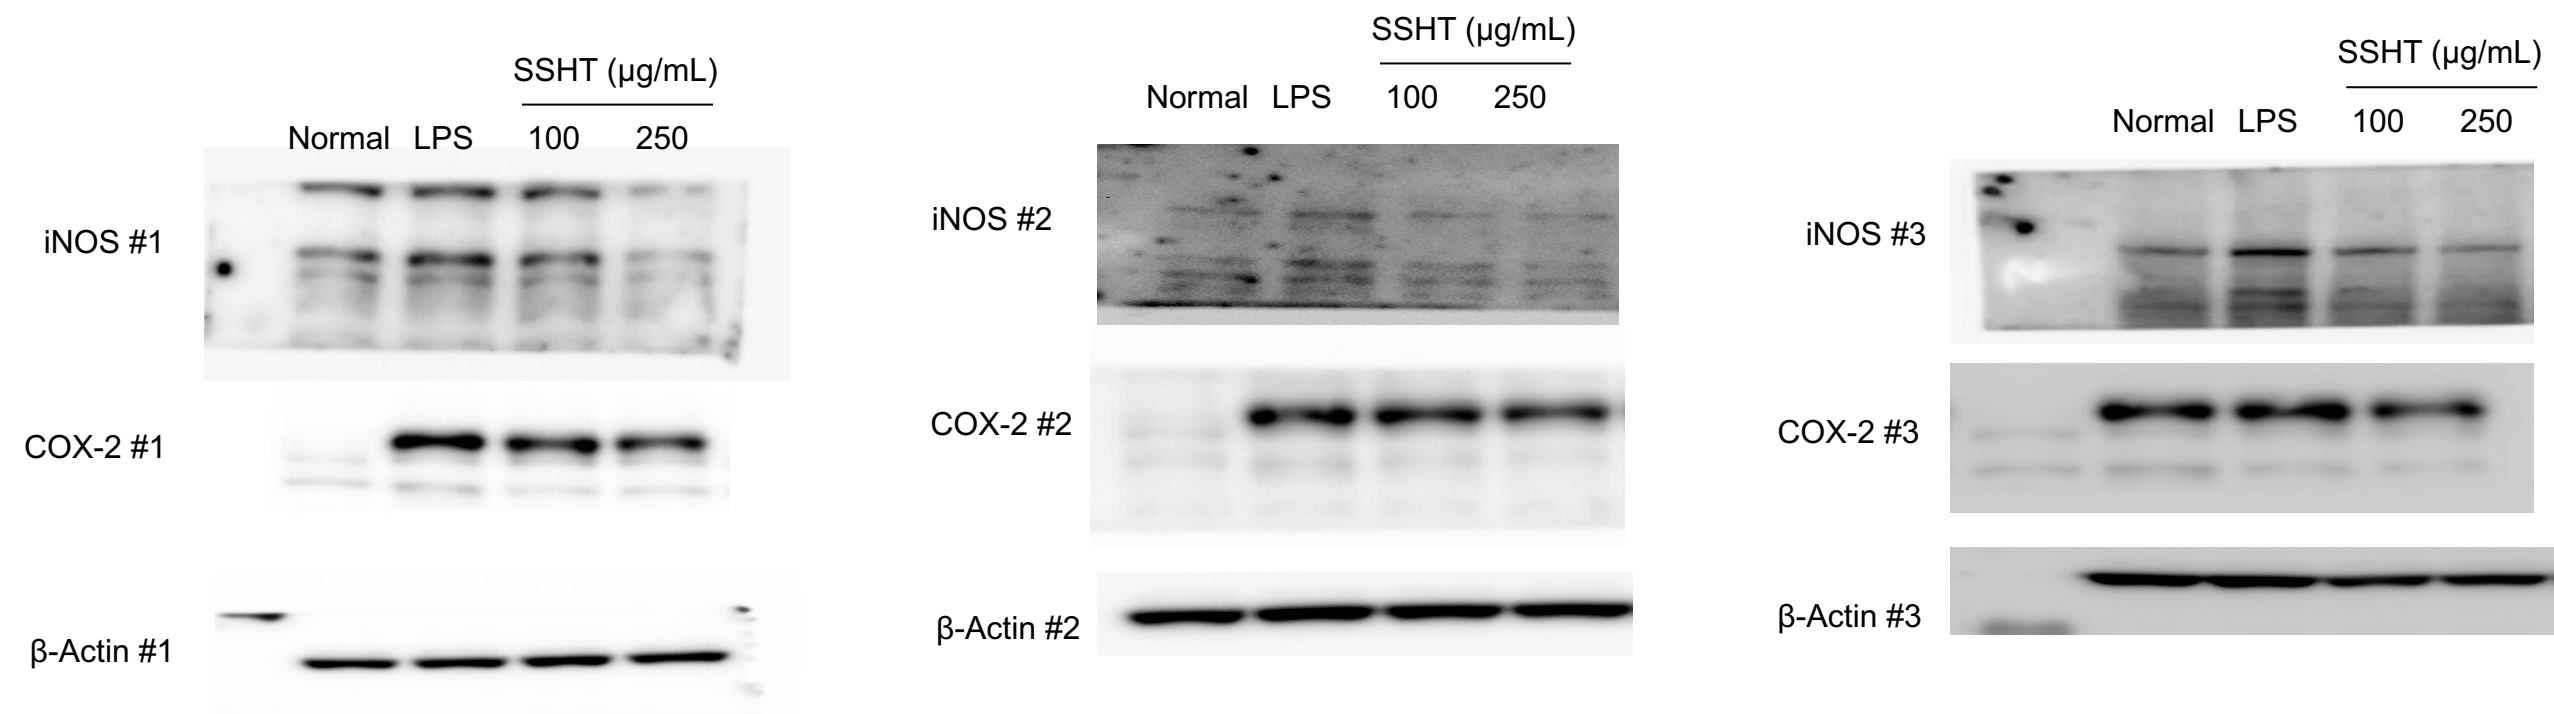

Figure 3. Effect of SSHT on nitrite production and inducible nitric oxide synthase (iNOS) and cyclooxygenase-2 (COX-2) abundance in LPS-stimulated RAW 264.7 cells.

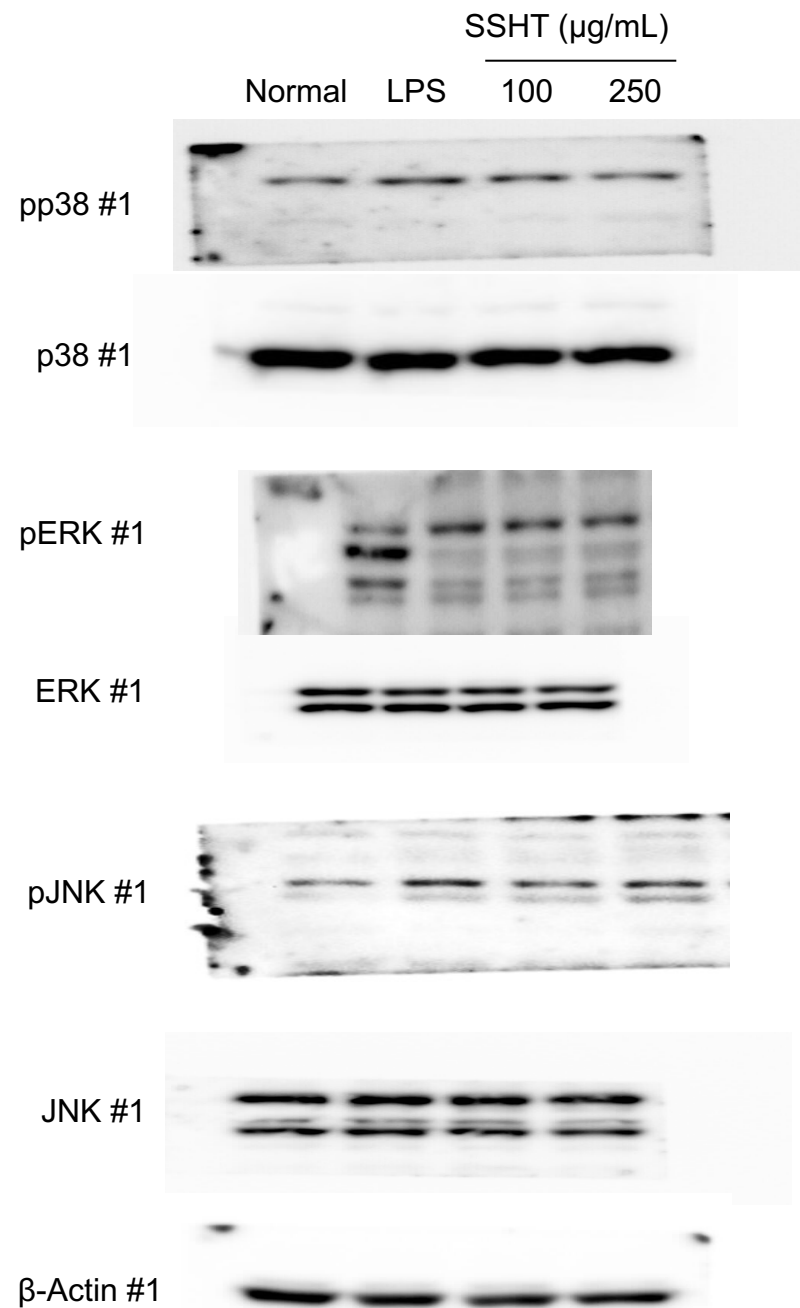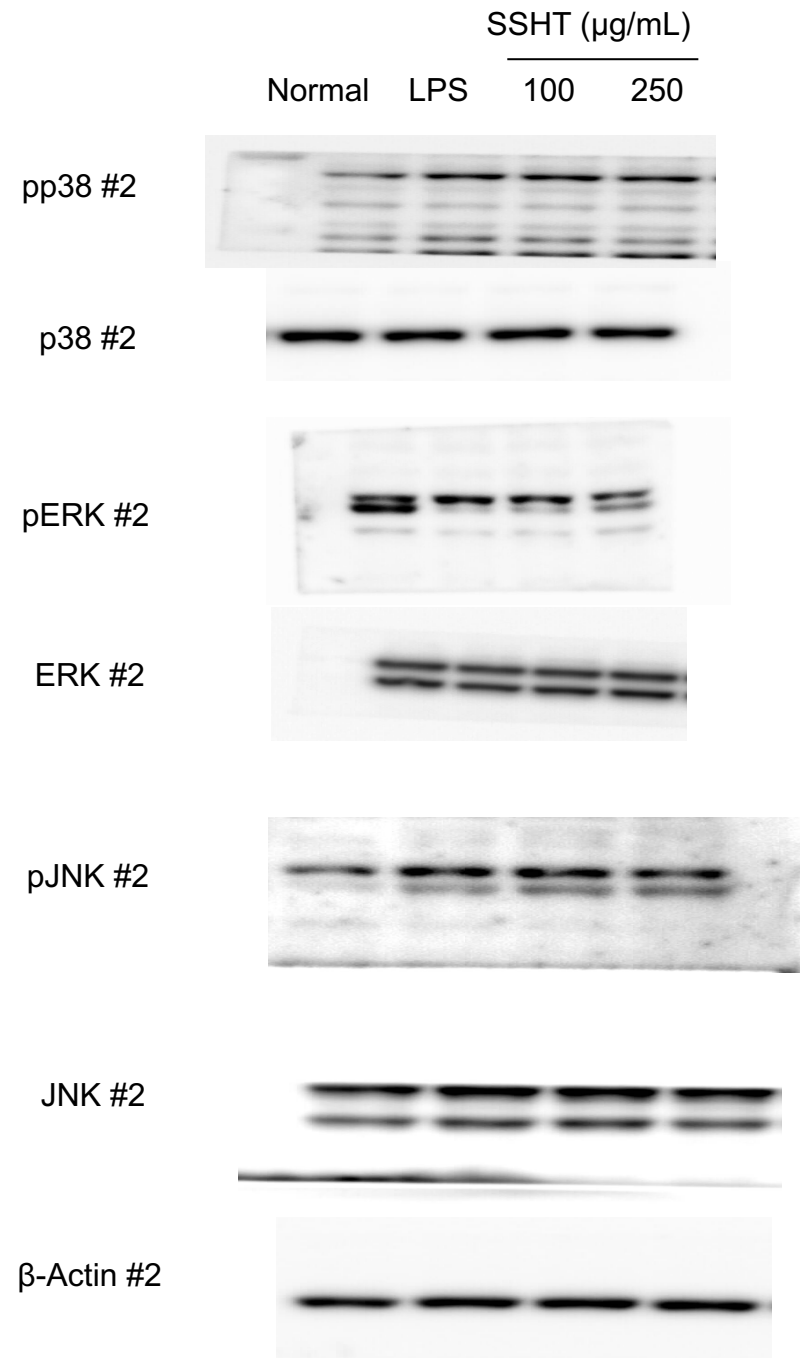

Figure 4. Effect of SSHT on p38, JNK, and ERK phosphorylation and total protein levels in LPS-stimulated RAW 264.7 cells.

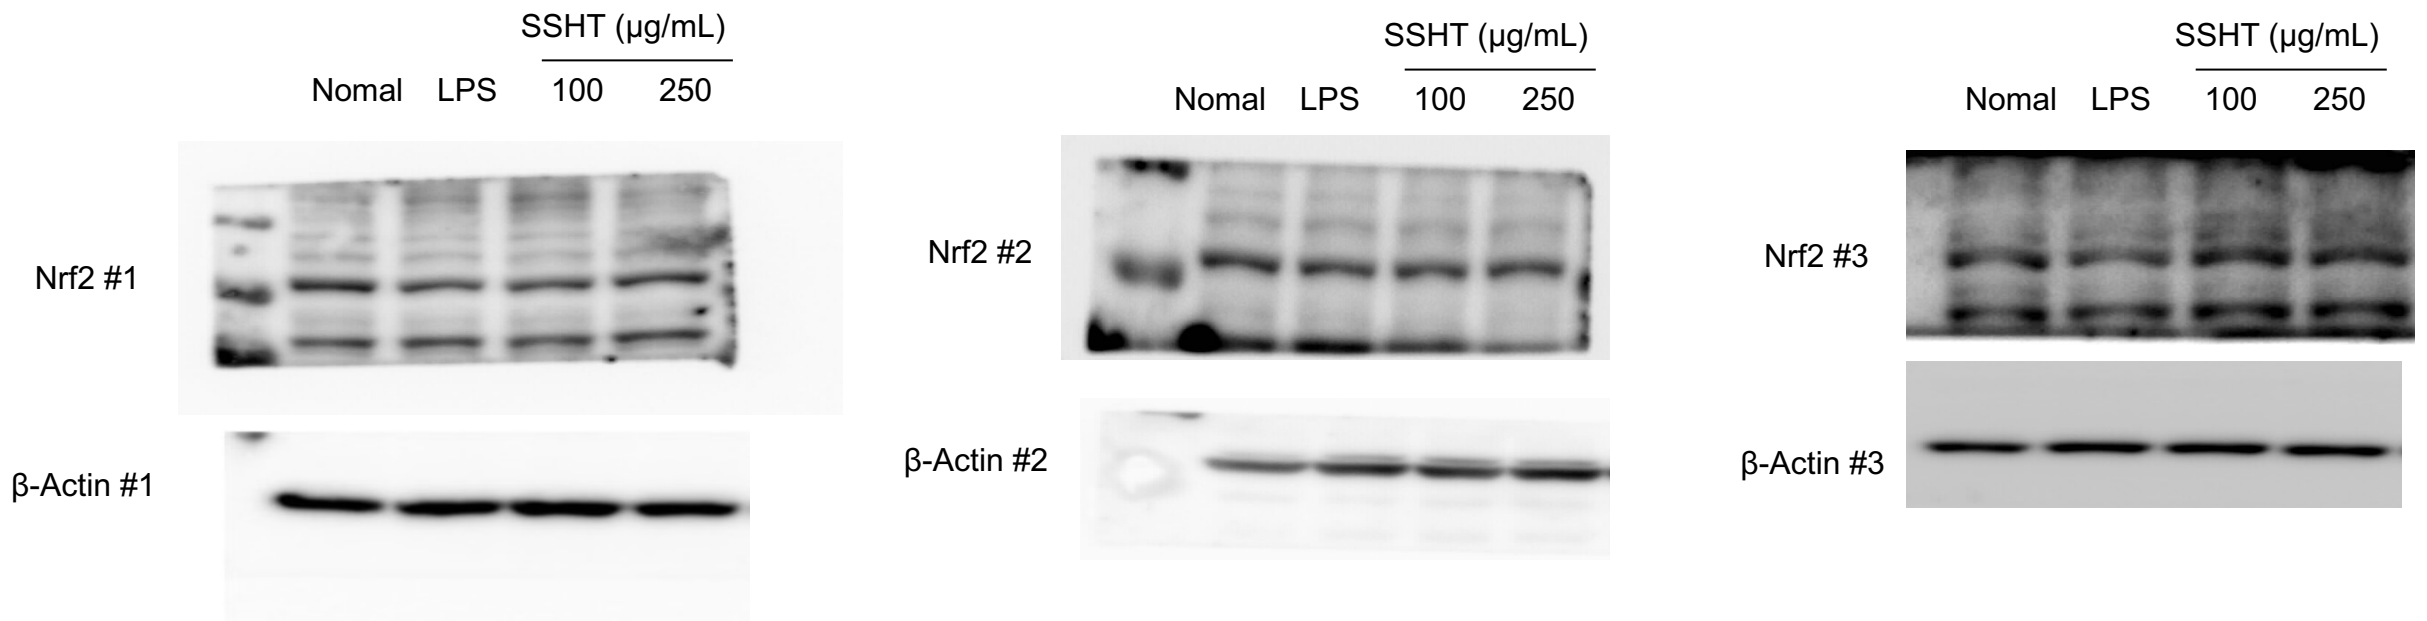

Figure 5. Effect of SSHT on nuclear factor erythroid 2-related factor 2 (NRF2) protein expression in LPS-stimulated RAW 264.7 cells.
